# Supplementary material for: Fluorescent molecular rotors detect O6-methylguanine dynamics and repair in duplex DNA
Source: Royal Society of Chemistry journal article supplement (doi:10.1039/d3cc04782b), 2023-12-19
Supplement: d3cc04782b1.pdf [file d3cc04782b1.pdf]

## Supporting Information

### Fluorescent molecular rotors detect $O^6$ -methylguanine dynamics and repair in duplex DNA

William Copp,<sup>‡ab</sup> Ashkan Karimi,<sup>‡ab</sup> Tianxiao Yang,<sup>bc</sup> Alba Guarné,<sup>bc</sup> and Nathan W. Luedtke<sup>\*abd</sup>

a. Department of Chemistry, McGill University, H3A-0B8 Montreal, Canada

b. Centre de recherche en biologie structural, McGill University, H3G 0B1 Montreal, Canada

c. Department of Biochemistry, McGill University, H3G 1Y6 Montreal, Canada

d. Department of Pharmacology and Therapeutics, McGill University, H3A-1A3 Montreal, Canada

‡ These authors contributed equally

| Contents                                                                                           | Page |
|----------------------------------------------------------------------------------------------------|------|
| Oligomer synthesis, purification and folding                                                       | S-2  |
| Fluorescence spectroscopy                                                                          | S-3  |
| Protein overexpression and purification                                                            | S-3  |
| Repair assays and Proteinase K digests                                                             | S-4  |
| Supporting tables and figures                                                                      |      |
| Table S1 Summary of extinction coefficients and ESI-MS data of oligonucleotides                    | S-4  |
| Figure S1 LC-MS analysis of $ds^{-ts}T:MG$ after incubation with WT MGMT                           | S-5  |
| Figure S2 LC-MS analysis of $ds^{-ts}T:MG$ duplex after incubation with C145A MGMT                 | S-6  |
| Figure S3 Overlay of chromatographs of $ds^{-ts}T:MG$ after incubation with WT or C145A MGMT       | S-7  |
| Figure S4 LC-MS analysis of $ds^{-ts}T:MG$ duplex with MGMT after instant quenching                | S-8  |
| Figure S5 LC-MS analysis of $ds^{-T}:MG$ duplex with MGMT after instant quenching                  | S-9  |
| Figure S6 Comparison of integrated LC-MS spectra of $ds^{-T}:MG$ duplex and $ds^{-ts}T:MG$ duplex  | S-10 |
| Figure S7 Reproducibility of data presented in Figure 3 of the main paper                          | S-11 |
| Figure S8 Repair assays of MGMT with $ds^{-ts}C:MG$ or corresponding repair product $ds^{-ts}C :G$ | S-12 |
| Figure S9 LC-MS analysis of $ds^{-ts}C:MG$ duplex after incubation with WT MGMT                    | S-13 |
| Figure S10 LC-MS analysis of $ds^{-ts}C:MG$ duplex after incubation with C145A MGMT                | S-14 |
| Figure S11 Overlay of chromatographs of $ds^{-ts}C:MG$ after incubation with WT or C145A MGMT      | S-15 |
| References                                                                                         | S-15 |

## Oligomer synthesis, purification, and folding

Standard DNA phosphoramidites, solid supports, and all necessary reagents were purchased from LinkTech and Sigma-Aldrich. MG-modified oligonucleotides were synthesized on a 1.0  $\mu$ mol scale using a Bioautomation Co. Mermade 4 DNA synthesizer according to the Trityl-off procedure. Three coupling reactions were performed for the site-specific introduction of the modified nucleoside into oligonucleotides. MG phosphoramidite (N-isobutryl protected) phosphoramidite were purchased from Glen Research and dissolved in dry acetonitrile (0.1 M) immediately prior to use. The synthesis of the oligonucleotides was monitored by DMT deprotection. Upon completion of the sequences, MG-modified oligonucleotides were cleaved from the solid support and deprotected by 1 mL of 10% DBU (1,8-Diazabicyclo[5.4.0]undec-7-ene) in anhydrous methanol in a glass vial. After keeping the solution at r.t for 5 days in the dark, the volume was reduced under vacuum and 1 mL, 10 mM aqueous sodium hydroxide solution was added. The obtained solutions were lyophilized to dryness and purified by HPLC column chromatography using a semi-prep C-18 reverse-phase column (YMCbasic B-22-10P 150 x 10 mm) using a Varian 140 Pro Star HPLC system. The gradient conditions were typically acetonitrile: 0.1 M triethylammonium acetate (TEAA, pH 7.4), 2:98 to 10:90 over 35 minutes and with rate of 3.00 mL/min. Elution was monitored by UV absorption at 260 nm (for MG-modified oligonucleotides). Peaks were collected and twice lyophilized to dryness from water. The purities of MG containing oligonucleotides were found to be >90% (260 nm) according to analytical, reverse-phase chromatography using a Waters XBridge C8, 5  $\mu$ m 4.6 x 150 mm. A gradient of 5–40% of acetonitrile in 0.1 M triethylammonium acetate (TEAA, pH 7.4), was applied over 35 minutes at 0.4 mL/min. Oligonucleotides were analyzed by LC-MS using a Dionex Ultimate 3000 UHPLC coupled to a Bruker Maxis Impact QTOF in negative ESI mode. Samples were run through a Phenomenex Luna C18(2)-HST column (2.5  $\mu$ M 120A 2.1 x 100 mm) using a gradient of 90% mobile phase A (100 mM HFIP and 5 mM TEA in H<sub>2</sub>O) and 10% mobile phase B (MeOH) to 40% mobile phase A and 60% mobile phase B in 20 minutes. The data was processed and spectra deconvoluted using the Bruker DataAnalysis software version 4.2. Oligonucleotide stock solutions were prepared in deionized water and their concentrations were determined by absorbance at 260 nm using the molar extinction coefficient calculated using a nearest-neighbor model.<sup>1</sup> and the molar extinction coefficient of MG was estimated to be the same as G.<sup>2</sup> Double-stranded oligonucleotides were prepared by diluting the

complementary sequences (1.0 : 1.2 equiv. ratio) in the PBS buffer (pH = 7.4, Na<sup>+</sup> concentration of ≈137 mM) and heating to 95 °C for 5 min, followed by slow cooling to room temperature over 4 h.

### Fluorescence spectroscopy

Oligonucleotide stock solutions were diluted into PBS buffer (pH = 7.4, Na<sup>+</sup> concentration of ≈137 mM) to a final concentration of 2.0 μM using their extinction coefficient at 260 nm. All measurements were collected on a Molecular Devices SpectraMax M5 in a 1 cm path-length quartz cuvette. Quantum yields were calculated using the most red-shifted absorbance maxima of samples. Quinine hemisulfate ( $\phi_R = 0.546$ ) in 0.5 M H<sub>2</sub>SO<sub>4</sub> ( $n_R = 1.346$ ) was used as the fluorescent standard. Quantum yields were calculated using the equation shown below<sup>2</sup>:

$$\Phi = \Phi_R \frac{F}{F_R} \frac{A_R}{A} \frac{n^2}{n_R^2}$$

where  $\phi_R$  is the quantum yield of the fluorescent standard,  $F$  and  $F_R$  are the integrated emissions of the sample and reference respectively.  $A$  and  $A_R$  are the optical densities of the sample and reference respectively (both set to  $0.10 \pm 0.01$ ).  $n$  and  $n_R$  are the refractive indexes of the sample and reference respectively.

### Protein overexpression and purification

The vector expressing a C-terminally His-tagged version of an inactive variant of human MGMT (MGMT-C145S) was a kind gift from the Wilds laboratory (Concordia University). The plasmids encoding wildtype MGMT (pAG9378) and MGMT-C145A variant (pAG9381) were generated by site-directed mutagenesis and verified by DNA sequencing (G  n  me Qu  bec Innovation Centre). MGMT and MGMT-C145A were produced in BL21(DE3)GOLD cells (Thermo Scientific). Cells were grown in LB medium supplemented with 100 μM ZnCl<sub>2</sub> to an optical density (600 nm) of ~0.7. Protein expression was induced by addition of 0.5 mM isopropyl β-D-1-thiogalactopyranoside (IPTG), followed by incubation at either 37°C for 3 h (wildtype) or 16 °C for 18 h (MGMT-C145A). Cells were harvested by centrifugation, resuspended in lysis buffer (20 mM Tris-HCl pH 8, 0.5 M NaCl, 5 mM β-mercaptoethanol, 45 mM imidazole, and 5% glycerol) in the presence of protease inhibitors (1 mM benzamidine, 1 mM PMSF, 5 μg/mL leupeptin, and 0.7 μg/mL pepstatin A), and sonicated. The insoluble fraction of the lysate was removed by centrifugation, and the supernatant was loaded onto a HisTrap HP 5 mL column (Cytiva). Contaminants were eluted with 45-60 mM imidazole, whereas MGMT eluted with 240 mM imidazole. The MGMT variants were further purified by cation exchange chromatography using a HiTrap SP HP 5 mL column (GE Healthcare) equilibrated with cation

exchange buffer (20 mM Tris pH 7, 50 mM NaCl, 5 mM  $\beta$ -mercaptoethanol, and 5% glycerol). Purified MGMT and MGMT-C145A were concentrated using Amicon centrifugal devices with a 10 kDa MWCO (Sigma-Aldrich) using storage buffer (20 mM Tris-HCl pH 8, 200 mM NaCl, 5 mM DTT, and 15% glycerol).

## Repair assays and Proteinase K digests

0.8  $\mu$ M of duplex DNA was incubated with 0.96  $\mu$ M of protein in a total volume of 150  $\mu$ L of activity buffer (100 mM NaCl, 10 mM Tris-HCl, 1 mM DTT, pH 7.6) for 30 seconds before a fluorescence spectrum was acquired. Samples were excited with an excitation wavelength of 310 nm and emission spectra were acquired from 260-600 nm. To these samples was added 0.5  $\mu$ L from 20 mg/mL stocks of Proteinase K (New England Biolabs, Ipswich, MA) and they were allowed to incubate for 3 hours before a second fluorescence measurement was acquired. All measurements were collected on a Molecular Devices SpectraMax M5 in a 1 cm path-length quartz cuvette.

## Supplementary tables and figures

**Table S1.** Synthesized oligonucleotides with their calculated (calc.) extinction coefficients ( $\epsilon$ ) at 260 nm, and calc. and observed masses and their deviation ( $\delta$ ) in parts-per-million (ppm).

| Oligonucleotide        | Sequence (5' $\rightarrow$ 3')              | $\epsilon_{260}$ (cm <sup>-1</sup> M <sup>-1</sup> ) | Calc. (m/z) | Found (m/z) | $\delta$<br>(ppm) |
|------------------------|---------------------------------------------|------------------------------------------------------|-------------|-------------|-------------------|
| <b>T</b>               | GCGA <b>T</b> CGCGCGCTAGCG                  | 156,210                                              | 5209.8910   | 5209.9375   | 8.9               |
| <b><sup>ts</sup>T</b>  | GCGA <sup>ts</sup> <b>T</b> CGCGCGCTAGCG    | 163,000                                              | 5347.9382   | 5347.8438   | 17.7              |
| <b><sup>ts</sup>T*</b> | GCGA <sup>ts</sup> <b>T</b> CGCGCGCTAGCG    | 163,000                                              | 5347.9382   | 5347.9375   | 0.1               |
| <b>MG</b>              | CGCTAGCGCGCG <b>MG</b> TCGC                 | 149,000                                              | 5199.8957   | 5200.0781   | 35.1              |
| <b>MG*</b>             | CGCTAGCGCGCG G TCGC                         | 149,000                                              | 5185.8800   | 5185.9453   | 12.6              |
| <b>MG1</b>             | CGCTAGCGCGCG <b>MG</b> ATCGC                | 152,000                                              | 5183.9007   | 5184.0625   | 31.2              |
| <b>MG3</b>             | CGCTAGCGCG <b>MG</b> CGATCGC                | 152,000                                              | 5183.9007   | 5184.0156   | 22.2              |
| <b>MG5</b>             | CGCTAGC <b>MG</b> CGCGATCGC                 | 152,000                                              | 5183.9007   | 5183.9297   | 22.2              |
| <b><sup>ts</sup>C</b>  | GCGA <sup>ts</sup> <b>C</b> CGC GCG CTA GCG | 159,000                                              | 5346.3960   | 5346.8906   | 92.5              |
| <b><sup>ts</sup>C*</b> | GCGA <sup>ts</sup> <b>C</b> CGC GCG CTA GCG | 159,000                                              | 5346.3960   | 5346.9531   | 104.2             |

\* = masses observed following incubation with WT MGMT

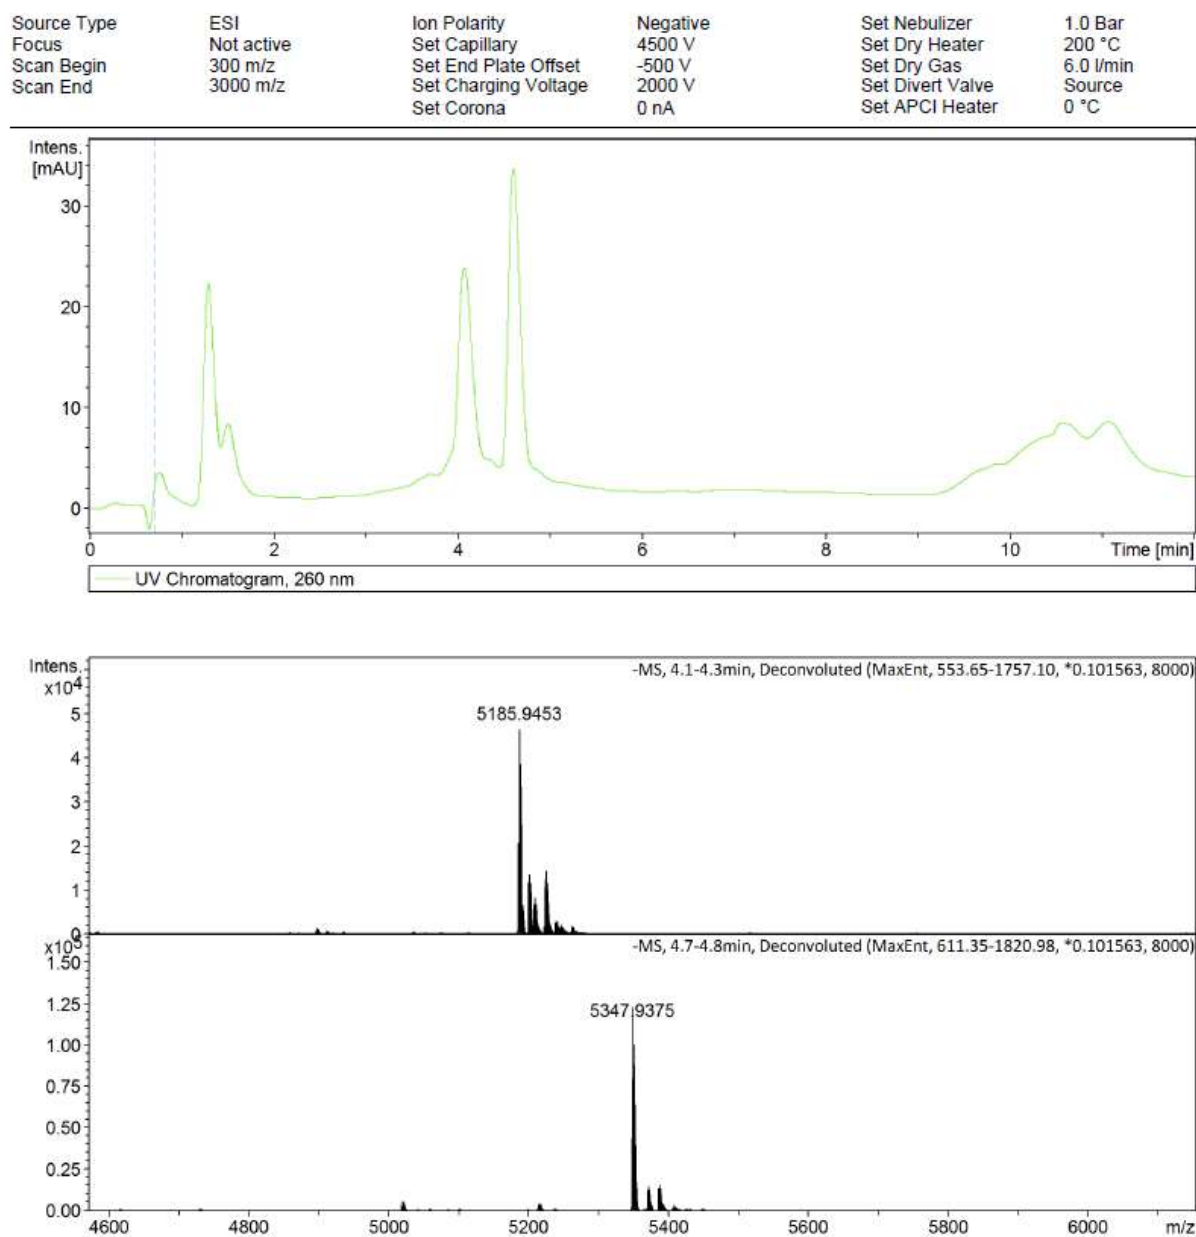

**Figure S1.** LC-MS analysis of *ds*<sup>-ts</sup>T:MG duplex after incubation with WT MGMT (1.2 eq.).

|             |            |                      |          |                  |           |
|-------------|------------|----------------------|----------|------------------|-----------|
| Source Type | ESI        | Ion Polarity         | Negative | Set Nebulizer    | 1.0 Bar   |
| Focus       | Not active | Set Capillary        | 4500 V   | Set Dry Heater   | 200 °C    |
| Scan Begin  | 300 m/z    | Set End Plate Offset | -500 V   | Set Dry Gas      | 6.0 l/min |
| Scan End    | 3000 m/z   | Set Charging Voltage | 2000 V   | Set Divert Valve | Source    |
|             |            | Set Corona           | 0 nA     | Set APCI Heater  | 0 °C      |

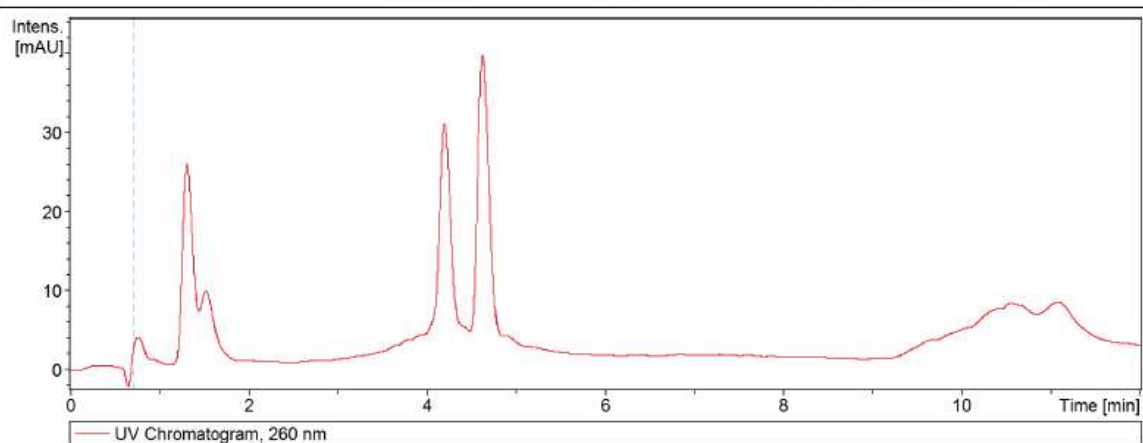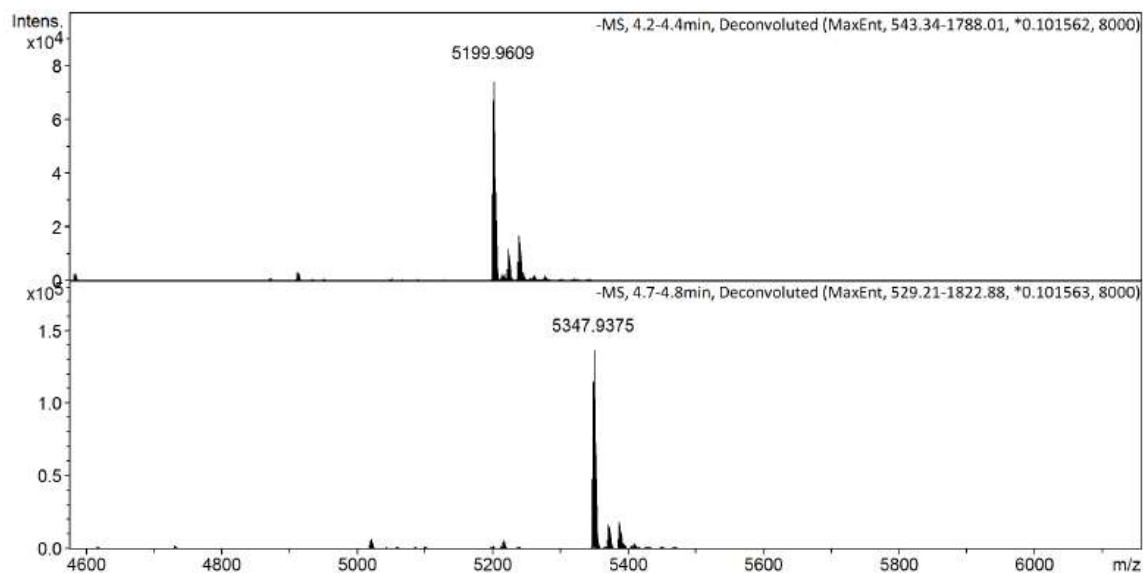

**Figure S2.** LC-MS analysis of *ds*<sup>-ts</sup>T:MG duplex after incubation with C145A mutated MGMT (1.2 eq.).

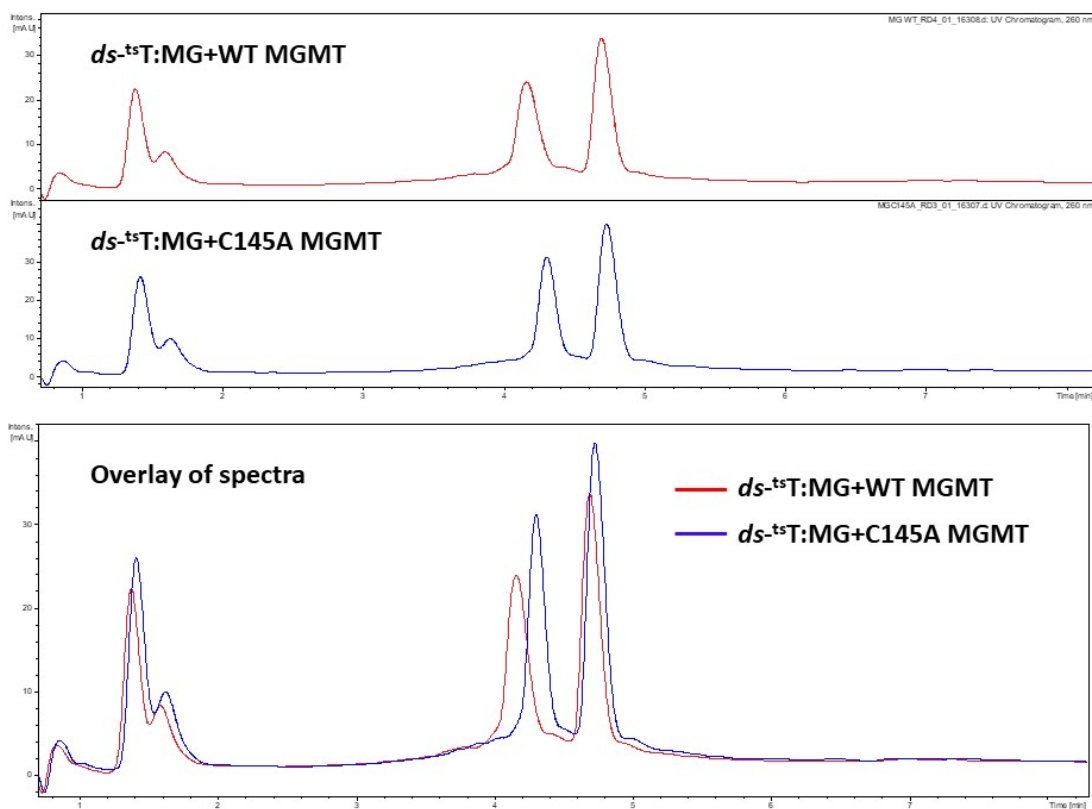

**Figure S3.** Overlay of chromatographs of *ds*-<sup>ts</sup>T:MG duplex after incubation with WT or C145A MGMT.

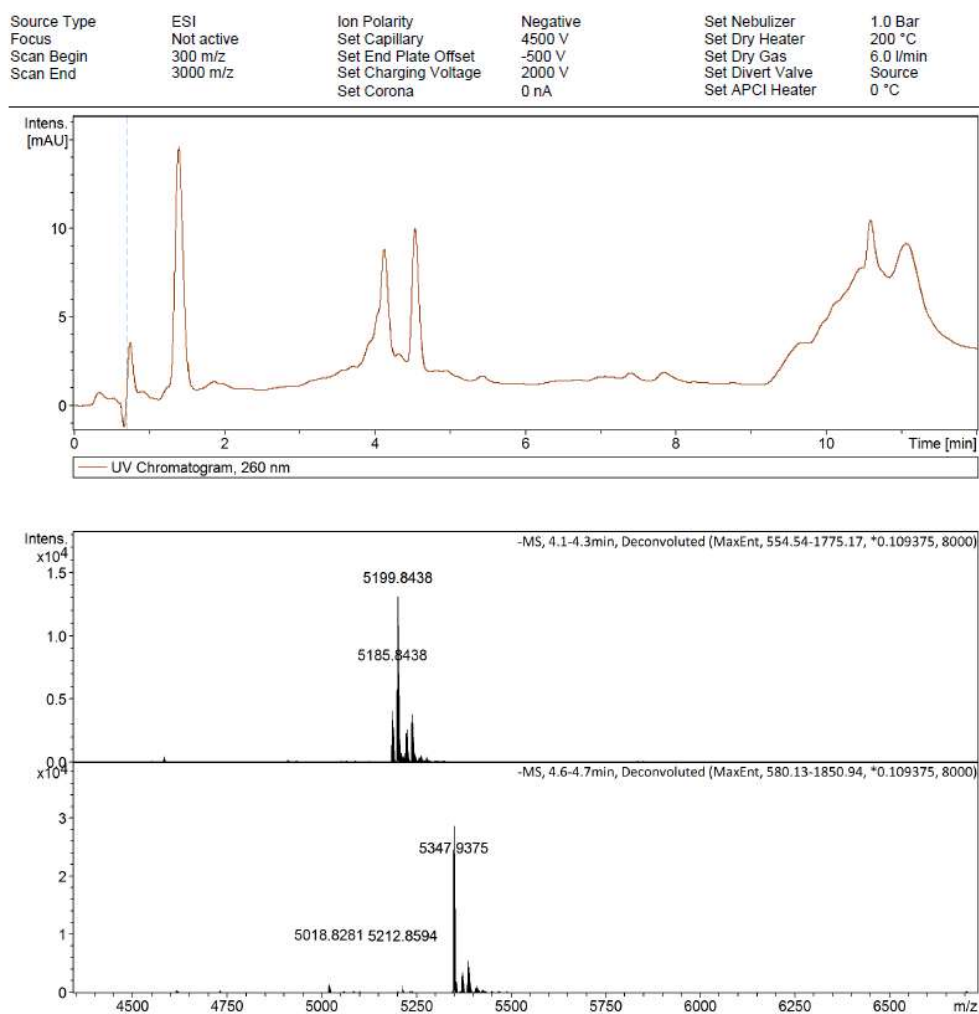

**Figure S4.** LC-MS analysis of *ds*<sup>-ts</sup>T:MG duplex (0.8  $\mu$ M) after incubation with WT MGMT (0.2 eq) for 1 second followed by heat inactivation and analysis.

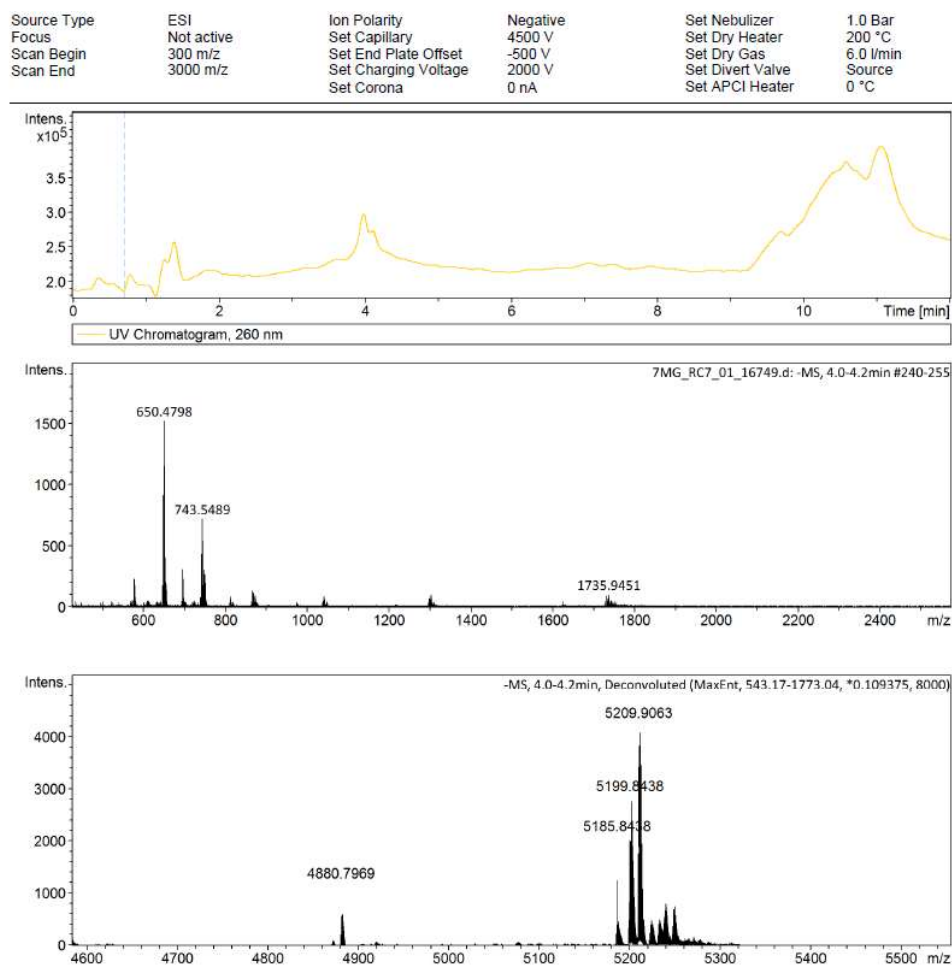

**Figure S5.** LC-MS analysis of *ds*-T:MG duplex (0.8  $\mu$ M) after incubation with WT MGMT (0.2 eq) for 1 second followed by heat inactivation and analysis.

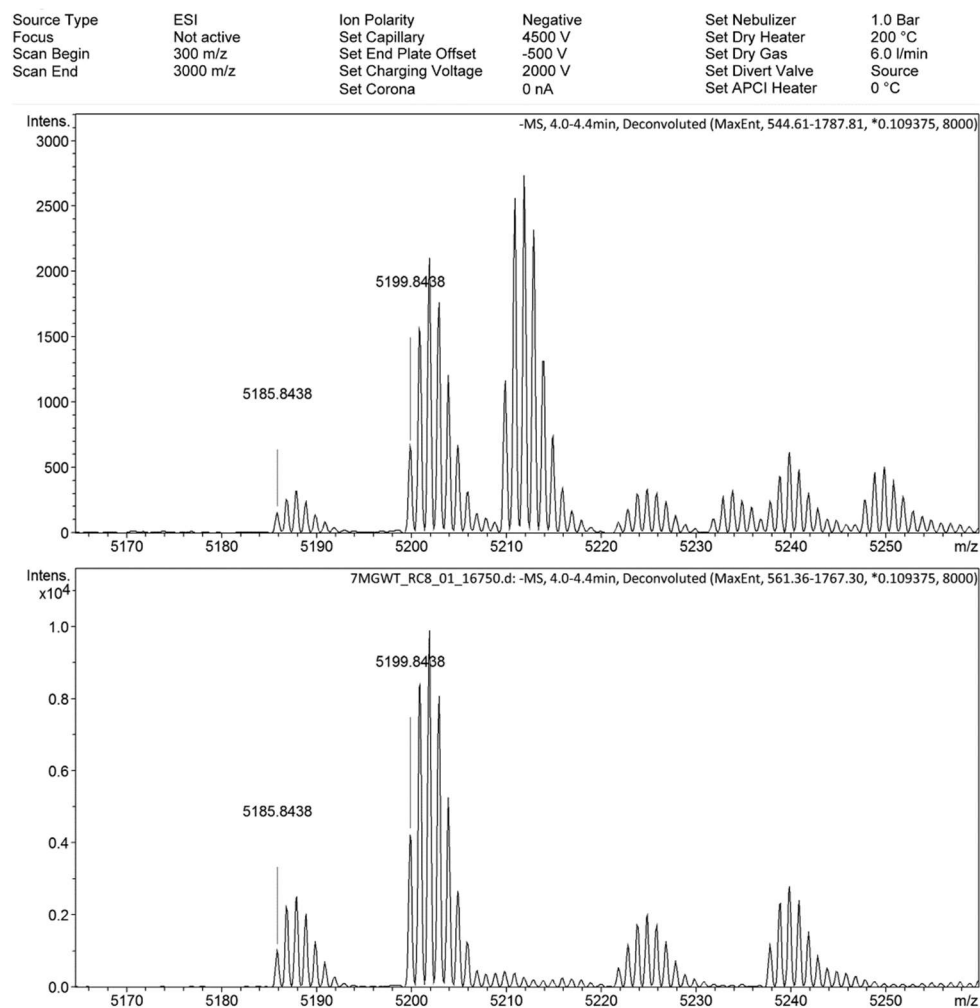

**Figure S6.** Comparison of integrated LC-MS spectra of *ds*-T:MG duplex (top) and *ds*-<sup>ts</sup>T:MG duplex (bottom) after incubation with WT MGMT for 1 second followed by heat inactivation and analysis.

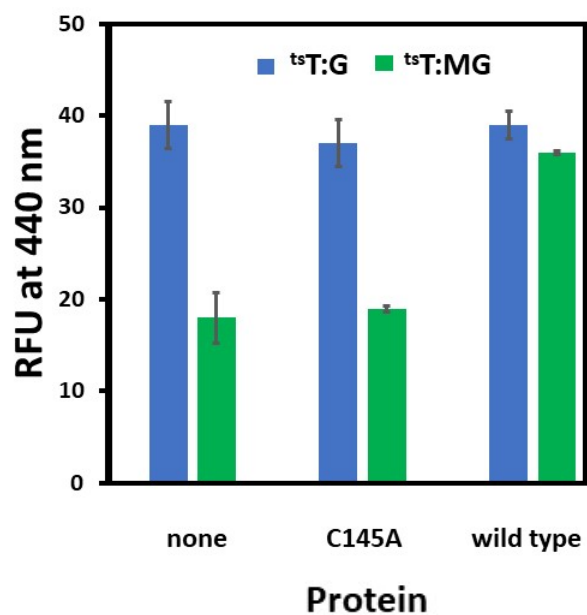

**Figure S7.** Average fluorescence intensities (Ex. = 310 nm, Em. = 440 nm) of <sup>ts</sup>T-containing duplexes (0.8  $\mu$ M DNA) incubated with 1.2 equivalents of WT or C145A MGMT in buffer for ~30 seconds at room temperature followed by addition of 0.5  $\mu$ L of Proteinase K (20 mg/mL) for 3 h and monitored by fluorescence. n = 3 independent replicates, error bars represent standard deviations.

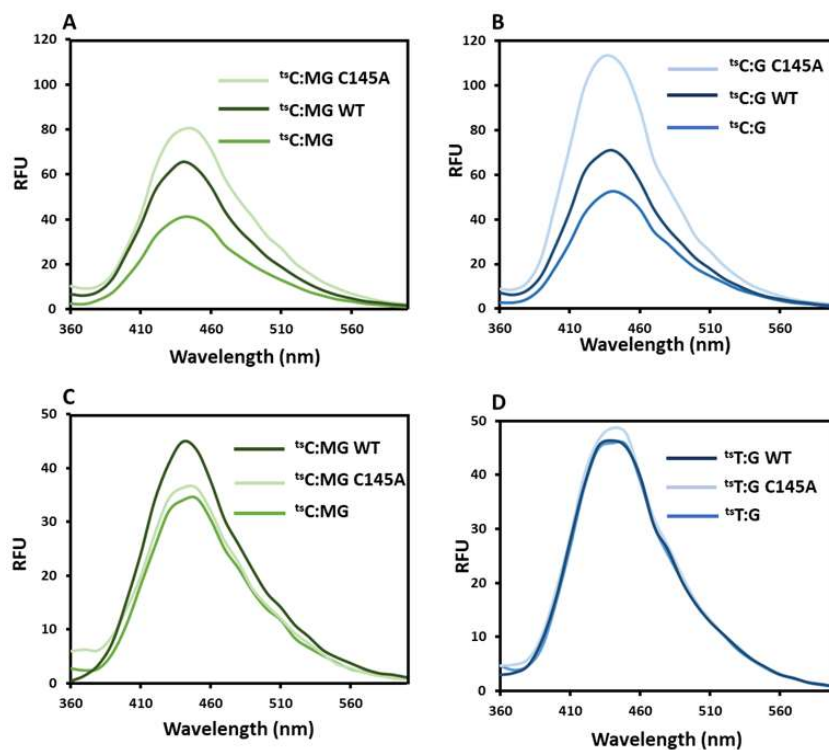

**Figure S8.** Repair assays of MGMT with ds- $^{13}\text{C}:\text{MG}$  or corresponding repair product-ds  $^{13}\text{C}:\text{G}$ . (A) – (B): Fluorescence spectra before the addition of Proteinase K. (C) – (D): Fluorescence spectra after the addition of Proteinase K.  $^{13}\text{C}$  containing oligonucleotide sequences. 0.8  $\mu\text{M}$  DNA duplex was incubated with 1.2 equivalents of MGMT in activity buffer for ~30 seconds at room temperature, optionally followed by heat inactivation and addition of 0.5  $\mu\text{L}$  of Proteinase K (20 mg/mL) at room temperature for 3 h and measured for fluorescence (excitation = 310 nm).

# Acquisition Parameter

|             |            |                      |          |                  |           |
|-------------|------------|----------------------|----------|------------------|-----------|
| Source Type | ESI        | Ion Polarity         | Negative | Set Nebulizer    | 1.0 Bar   |
| Focus       | Not active | Set Capillary        | 4500 V   | Set Dry Heater   | 200 °C    |
| Scan Begin  | 300 m/z    | Set End Plate Offset | -500 V   | Set Dry Gas      | 8.0 l/min |
| Scan End    | 3000 m/z   | Set Charging Voltage | 2000 V   | Set Divert Valve | Source    |
|             |            | Set Corona           | 0 nA     | Set APCI Heater  | 0 °C      |

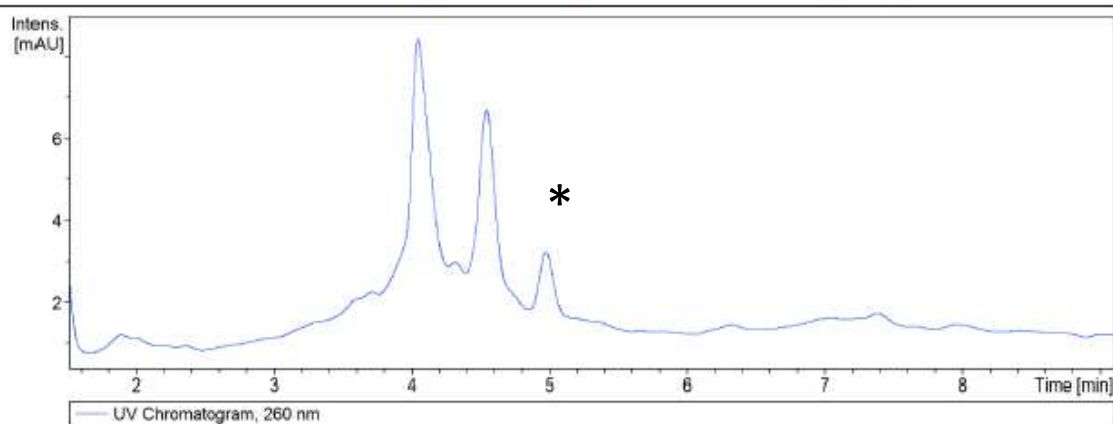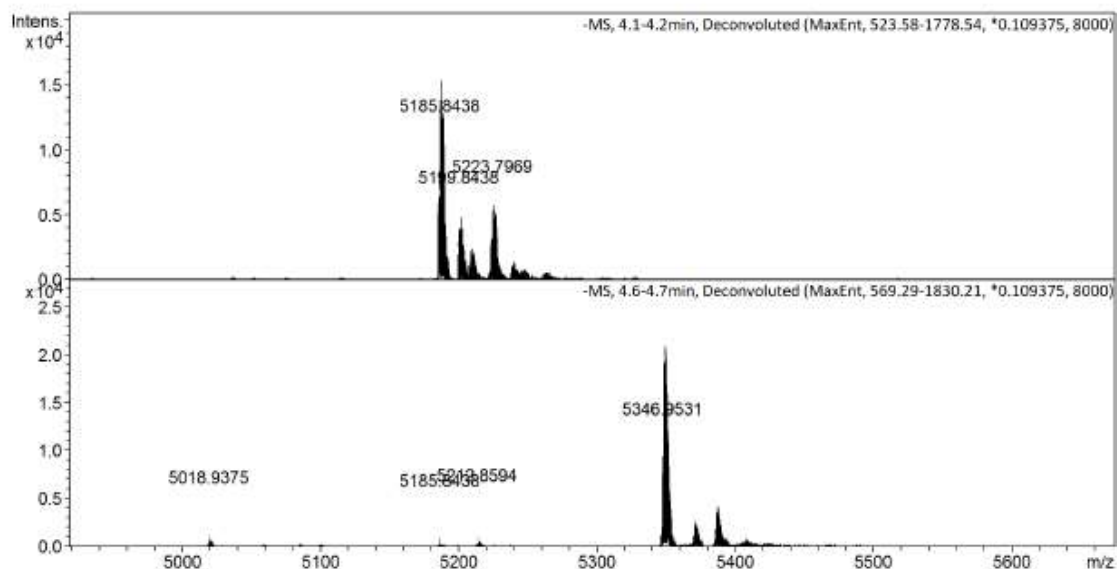

**Figure S9.** LC-MS analysis of *ds*-<sup>13</sup>C:MG duplex after incubation with WT MGMT (1.2 eq.).

\* = no detectable mass in peak.

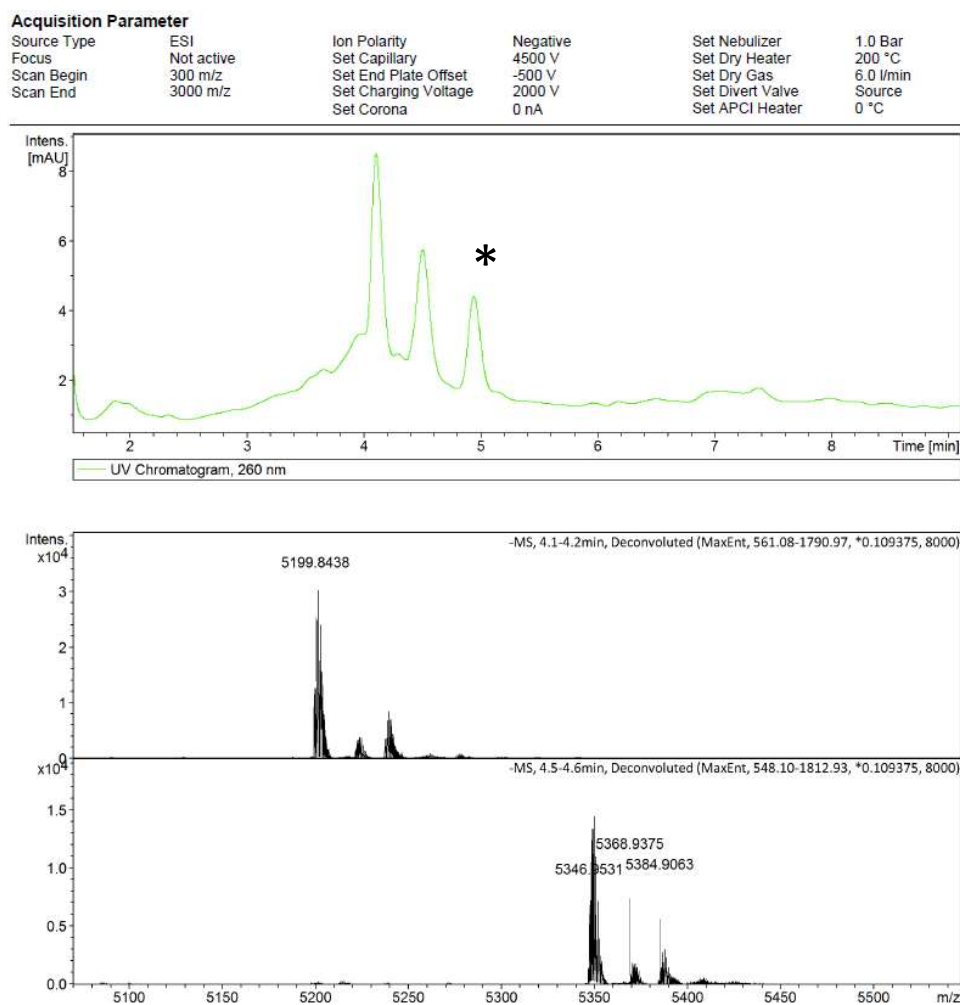

**Figure S10.** LC-MS analysis of  $ds^{-ts}C:MG$  duplex after incubation with C145A MGMT (1.2 eq.).

\* = no detectable mass in peak.

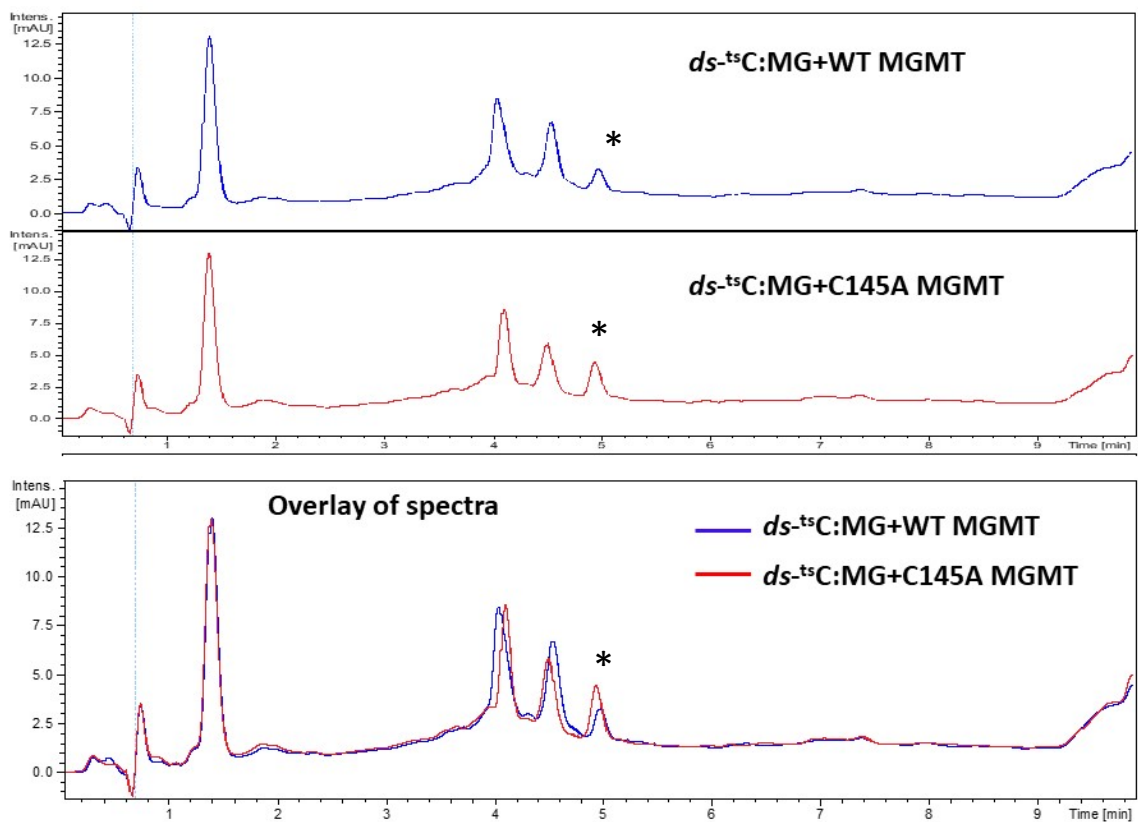

**Figure S11.** Overlay of chromatographs of  $ds\text{-}^{ts}\text{C:MG}$  duplex after incubation with WT or C145A MGMT.

\* = no detectable mass in peak.

## References

- [1] 1. C. R. Cantor, M. M. Warshaw, H. Shapiro, *Biopolymers* **1970**, 9, 1059-1077.
- [2] C. W. Abner, A. Y. Lau, T. Ellenberger, L. B. Bloom, *J. Biol. Chem.* **2001**, 276, 13379-13387.
